# Supplementary material for: Barriers, enablers and initiatives for uptake of advance care planning in general practice: a systematic review and critical interpretive synthesis
Source: PubMed Central journal article supplement — BMJ Open. 2019 Sep 18;9(9):e030275. doi: 10.1136/bmjopen-2019-030275 (PMC6756326; doi:10.1136/bmjopen-2019-030275), 2019-09-18
Supplement: bmjopen-2019-030275supp001.pdf [file bmjopen-2019-030275supp001.pdf]

## Supplementary file 1: Decision matrix

| Contextual level of influence | Description of Criteria used to determine level of influence.                                                                                                                                             | Example in general practice context                                                                                                                                                                                                                                                                                         |
|-------------------------------|-----------------------------------------------------------------------------------------------------------------------------------------------------------------------------------------------------------|-----------------------------------------------------------------------------------------------------------------------------------------------------------------------------------------------------------------------------------------------------------------------------------------------------------------------------|
| Individual                    | The primary focus of the study was to seek understanding about or to effect change at an individual/ patient/ consumer                                                                                    | A study to ask patients about their personal views on advance care planning                                                                                                                                                                                                                                                 |
| Interpersonal                 | the primary focus of the study was to seek understanding about or to effect change at a relationship level - involving family, friends, trusted others including relationships with health care providers | A study exploring predominately interpersonal considerations for example a link between the likelihood of engaging in ACP discussion after experience of caring for someone at end of life                                                                                                                                  |
| Provider                      | If the primary focus of the study was to seek understanding about or to effect change at a provider level within general practice including knowledge, attitudes practices                                | A study to measure provider knowledge of ACP                                                                                                                                                                                                                                                                                |
| System                        | If the primary focus of the study was to seek understanding about organizational processes and practice infrastructure with regard to ACP                                                                 | A study to test the efficacy of a range of ACP discussion tools in increasing ACP uptake                                                                                                                                                                                                                                    |
| Multi-level                   | If the interventions described in the study had a focus on or sought to determine effect or influence across more than one contextual level of influence                                                  | A study with a multi pronged approach – for example to test efficacy of written material for patients, combined with an activity focused on provider education about ACP, and sending IT prompts for providers during patient consultations would be an example of a complex intervention across multi-levels of influence. |
